# Supplementary material
Source: PubMed Central journal article supplement (PMC4449735)

## Supplementary Figures

### **Method development for structural characterization of sulfated steroids with mass spectrometry: Applications in animal communication**

Yuetian Yan<sup>1</sup>, Don Rempel<sup>1</sup>, Timothy E. Holy<sup>2</sup>, Michael L. Gross<sup>1</sup>

Center for Biomedical and Bioorganic Mass Spectrometry, Department of Chemistry<sup>1</sup>,  
Washington University in St. Louis, St. Louis, MO

Department of Anatomy and Neurobiology, Washington University School of Medicine<sup>2</sup>,  
Washington University in St. Louis, St. Louis, MO

Figure S1. Mass spectra in the negative-ion mode for (a) SS425 (b) SS441 (c) SS425 after HDX (d) SS441 after H/DX.

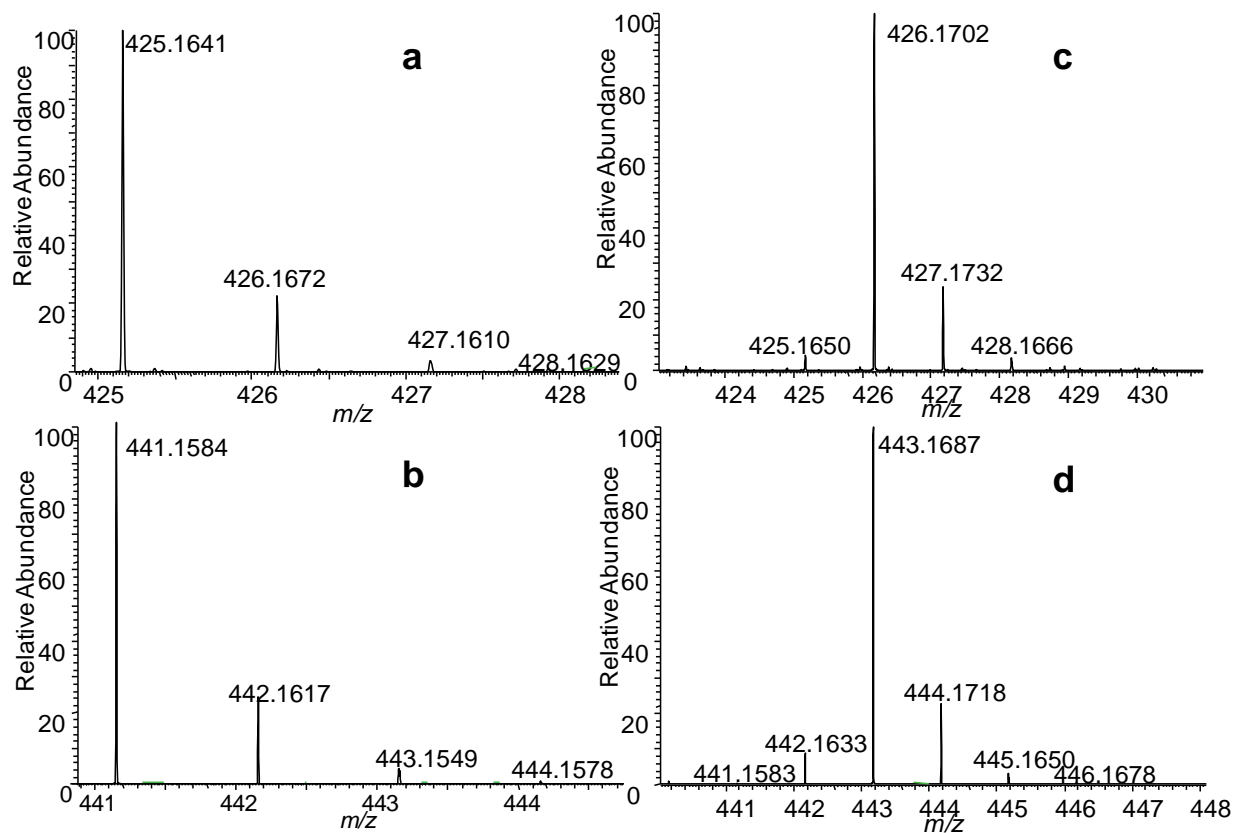

Figure S2. DESI mass spectra in the negative-ion mode for (a) SS425, (b) SS441. Reactive DESI mass spectra in the positive-ion mode of (c) SS425, (d) SS441.

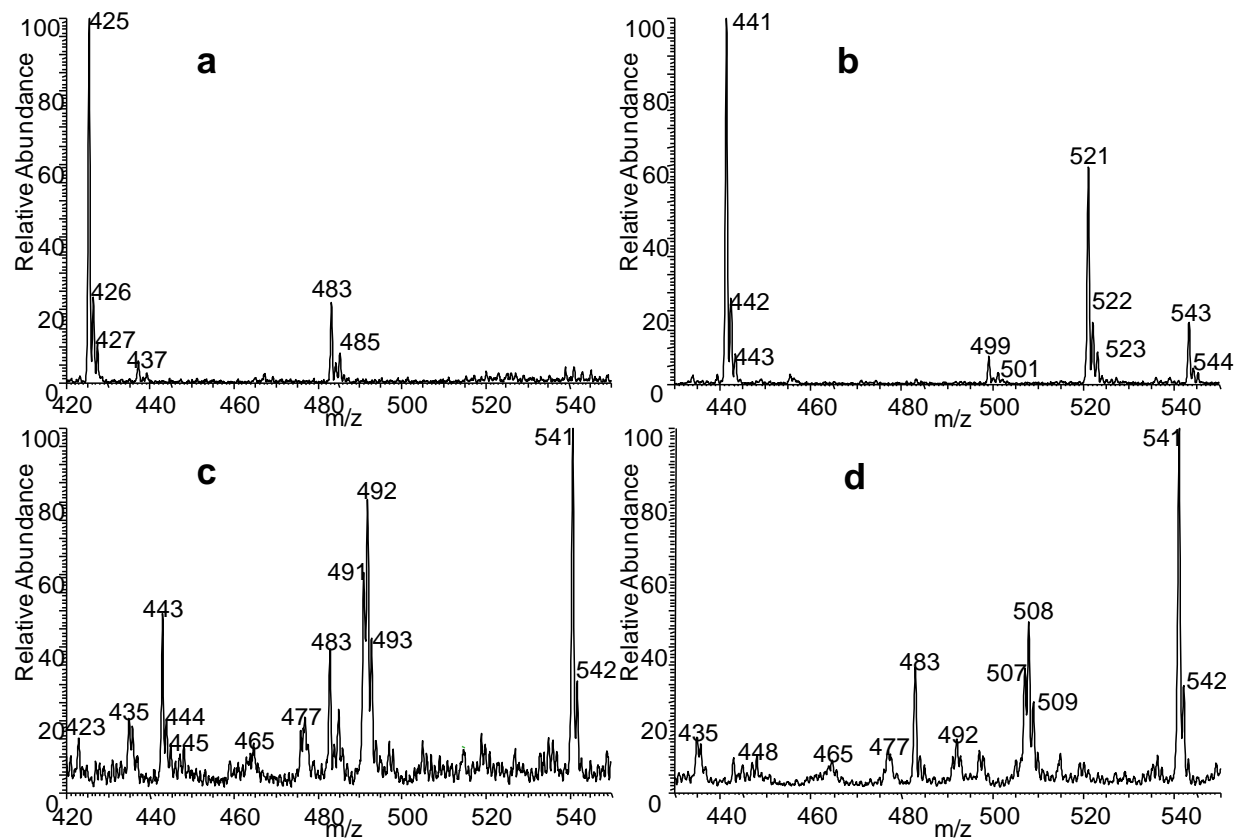

Figure S3. Product-ion ( $MS^3$ ) spectrum of the  $m/z$  410 product ion of SS425 and proposed fragmentation pathways.

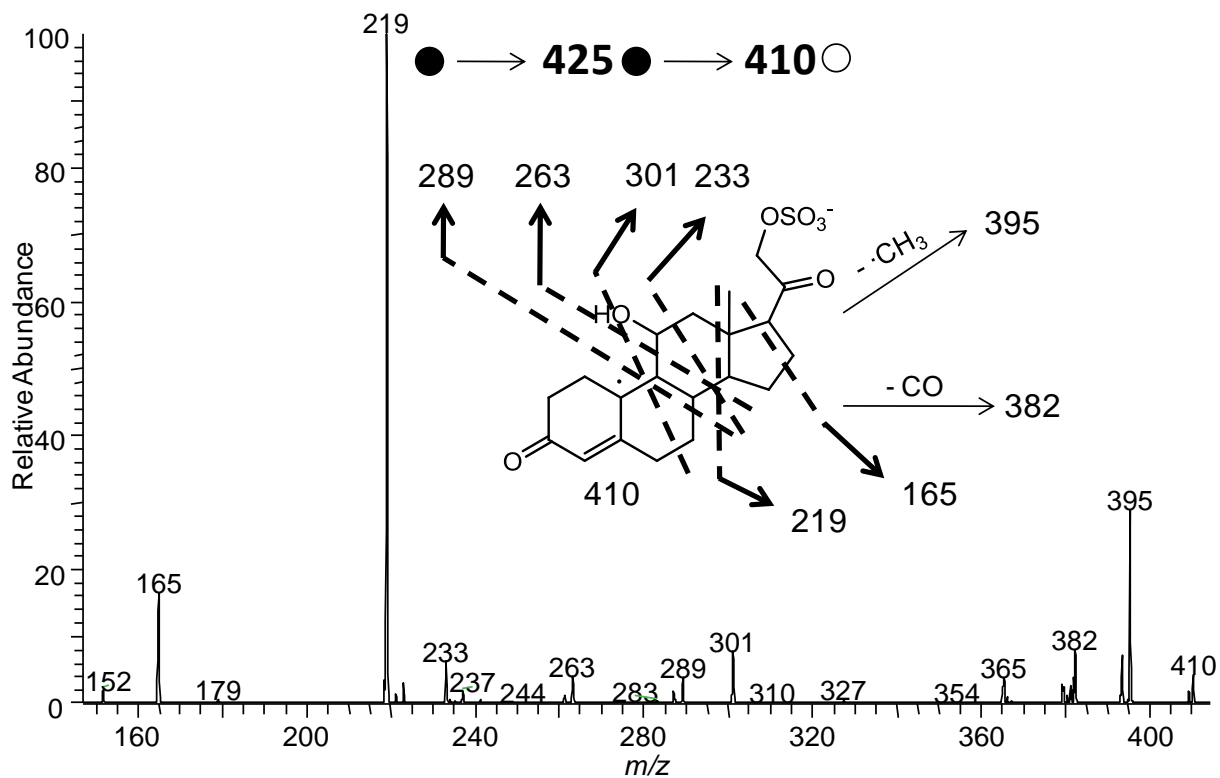

Figure S4. Product-ion ( $MS^3$ ) spectrum of the  $m/z$  271 product ion of SS425 and proposed fragmentation pathways.

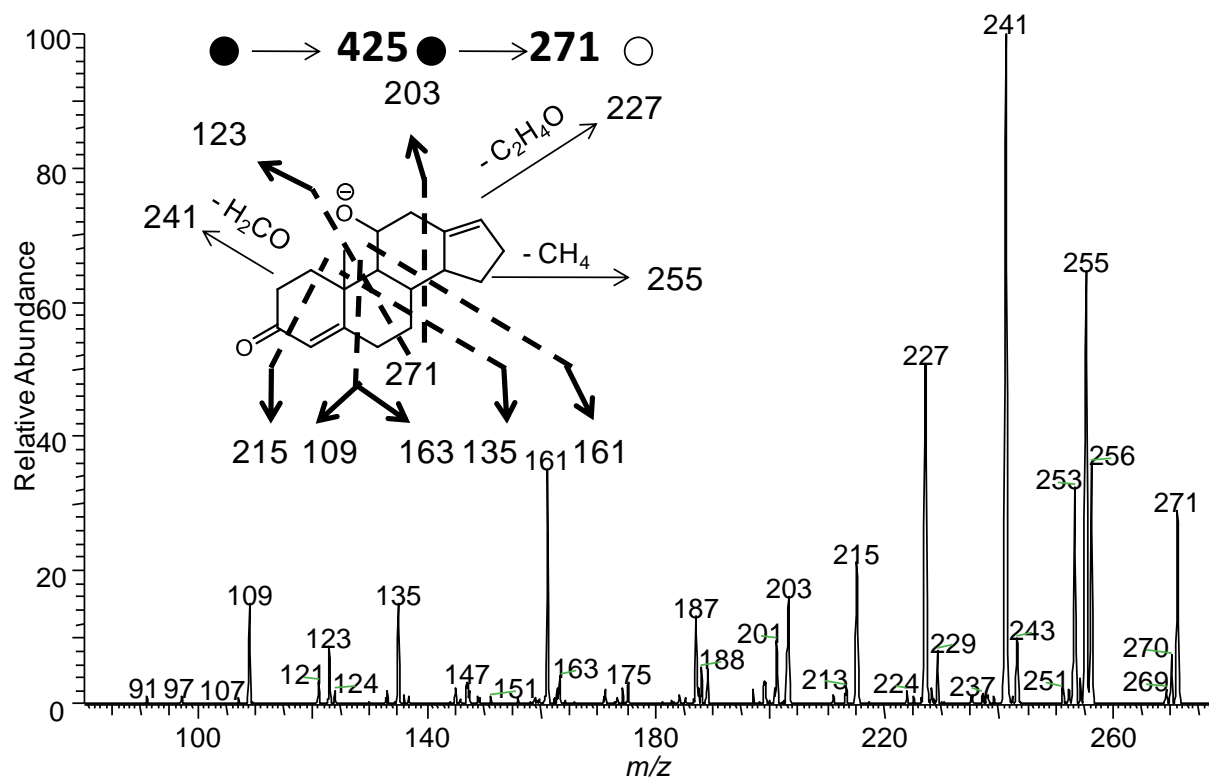

Figure S5. Product-ion ( $MS^3$ ) spectrum of the  $m/z$  189 product from SS425 and a proposed fragmentation pathway.

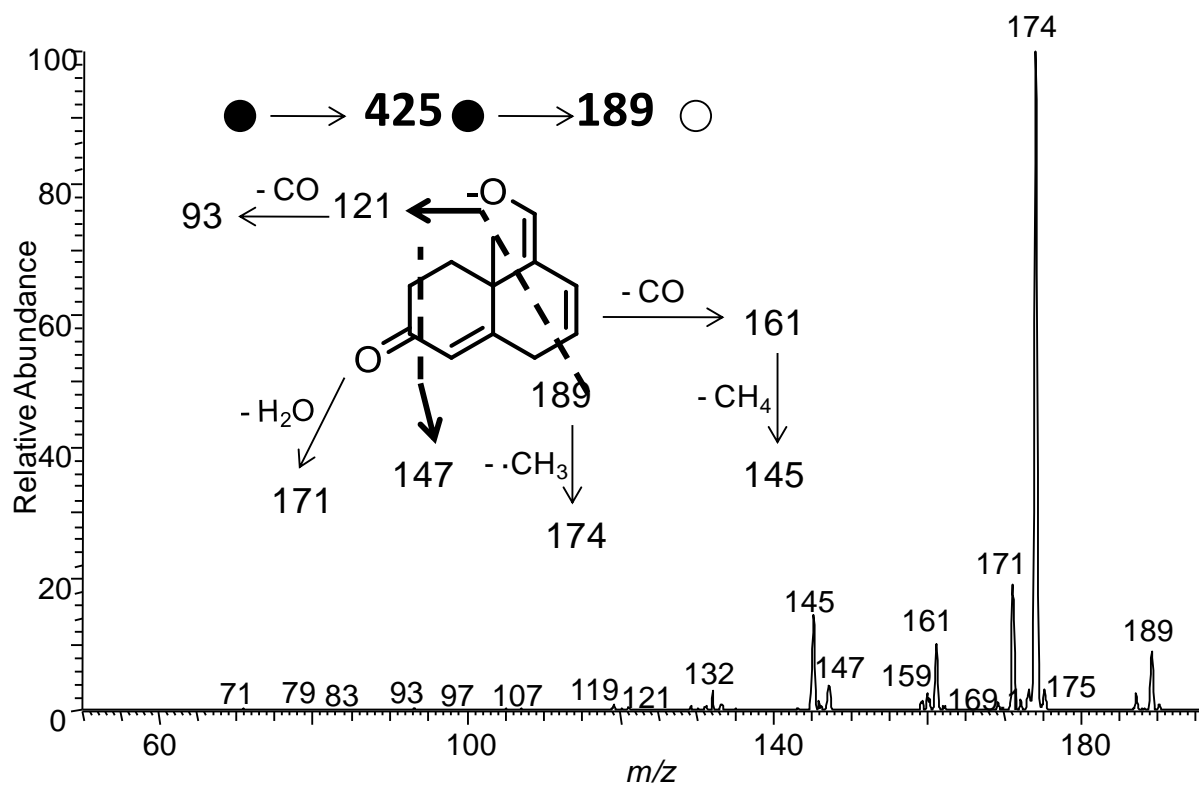

Figure S6. Product-ion ( $MS^3$ ) spectrum of the  $m/z$  423 ion of SS441 and a proposed fragmentation pattern

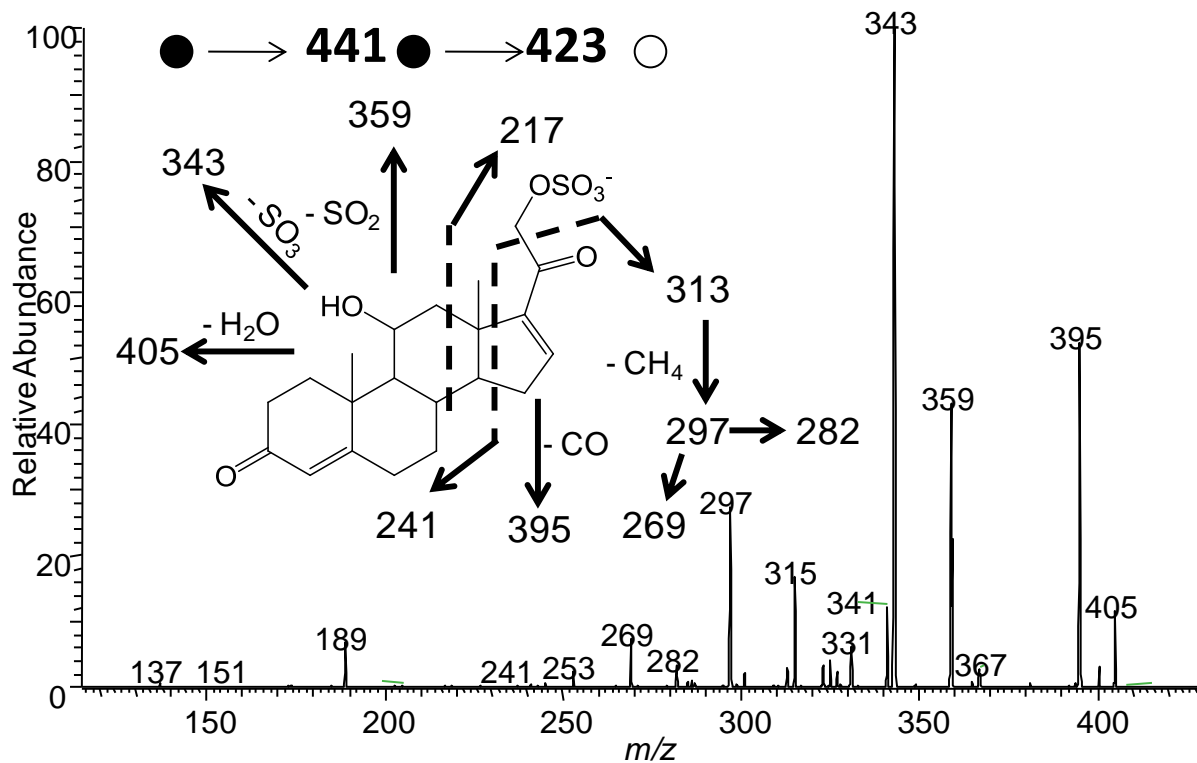

Figure S7. Product-ion ( $MS^3$ ) spectrum of the  $m/z$  426 product ion of SS441 and proposed fragmentation pathways.

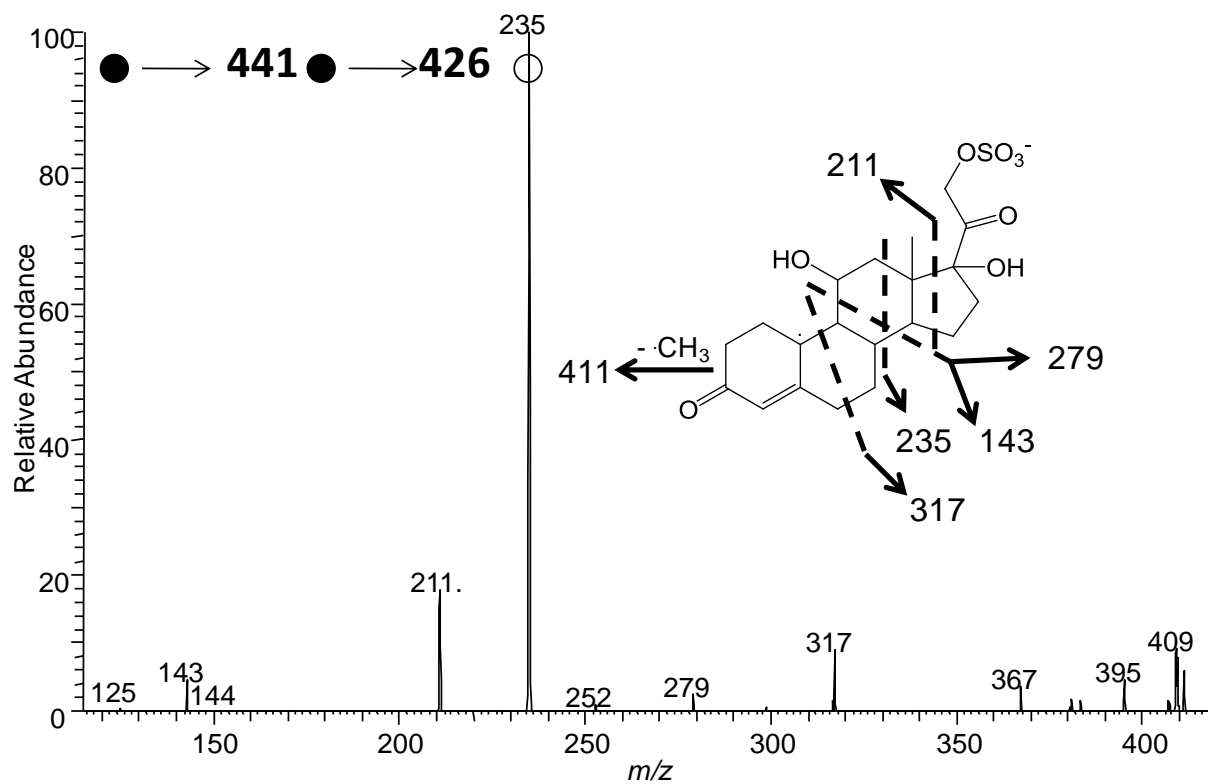



Figure S8. Product-ion ( $MS^3$ ) spectrum of the  $m/z$  297 product ion of SS441 and its proposed fragmentation pathways.

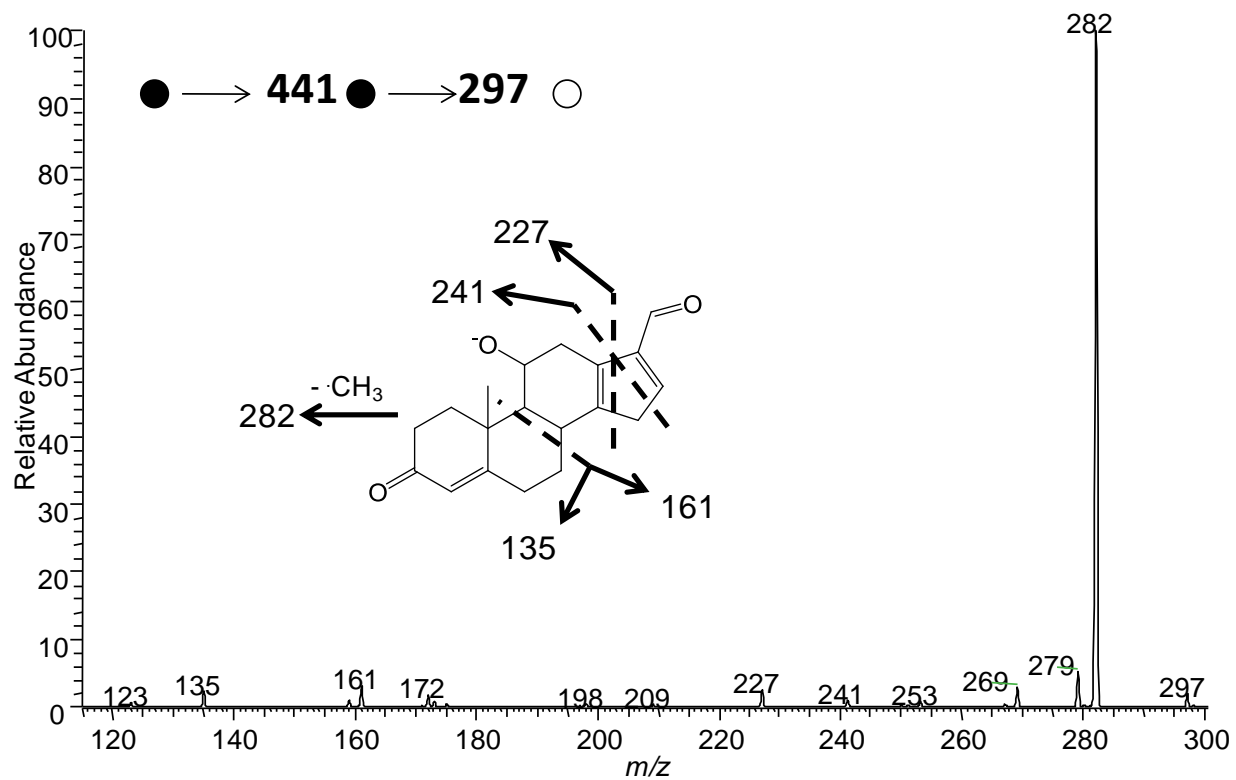

Supplement: NIHMS691860-supplement-supplement_1.pdf [file NIHMS691860-supplement-supplement_1.pdf]
